# Supplementary material for: Identification of Guide-Intrinsic Determinants of Cas9 Specificity
Source: PubMed Central journal article supplement (PMC6694761; doi:10.1089/crispr.2019.0009), 2019-06-21
Supplement: Supp_Fig2.pdf [file Supp_Fig2.pdf]

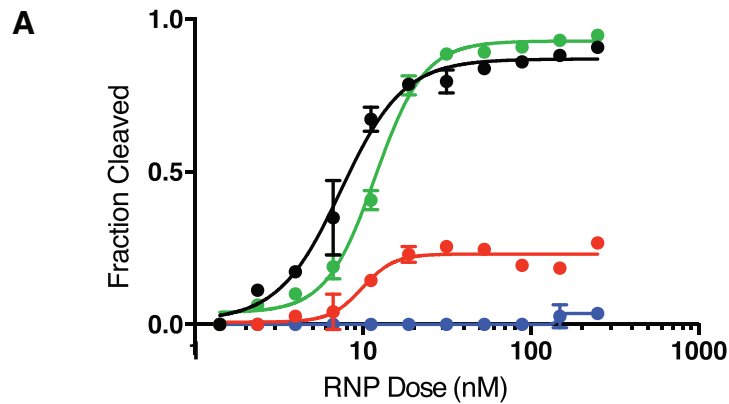

|                | Sequence                                | BLT cleavage efficiency | $A_{\max}$ |
|----------------|-----------------------------------------|-------------------------|------------|
| ● On-target    | GGGTGAGTGAGTGTGTGCGTG                   | 0.98                    | 0.87       |
| ● Off-target 1 | GGGT <b>A</b> AGTGAGTGTG <b>A</b> GCGTG | 0.97                    | 0.93       |
| ● Off-target 2 | GGGTGA <b>T</b> TGA <b>T</b> TGTGTGCGTG | 0.50                    | 0.23       |
| ● Off-target 3 | GGGTGAGTGAGTGTG <b>GGC</b> CTG          | 0.05                    | 0.04       |

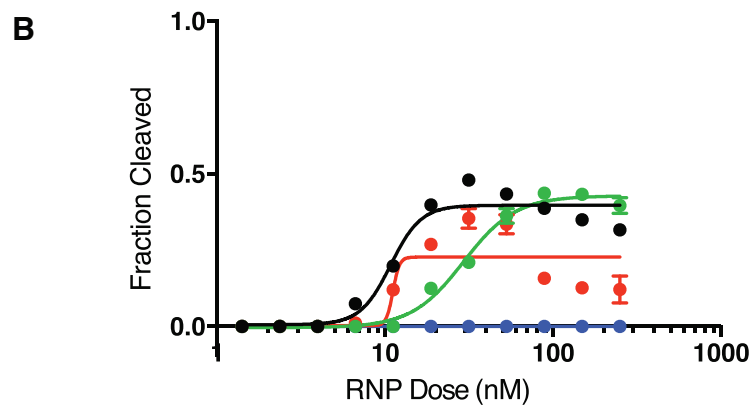

|                | Sequence                                | BLT cleavage efficiency | $A_{\max}$ |
|----------------|-----------------------------------------|-------------------------|------------|
| ● On-target    | GGCCTCCCCAAAGCCTGGCCA                   | 0.43                    | 0.40       |
| ● Off-target 1 | GG <b>G</b> CTCCCCAAAGC <b>T</b> TGGCCA | 0.69                    | 0.43       |
| ● Off-target 2 | GGC <b>T</b> TC <b>T</b> CAAAGCCTGGCCA  | 0.29                    | 0.23       |
| ● Off-target 3 | GGCCT <b>GCG</b> CAAAGCCTGGCCA          | 0.08                    | 0.00       |

**SUPPLEMENTARY FIG. S2.** Individual templates validate library results in biochemical cleavage assays. **(A)** Three representative doubly mismatched targets were subjected to increasing doses of VEGFA Cas9 RNP. Rank ordering of the cleavage efficiency in individual testing is consistent with BLT-measured results.  $A_{\max}$  represents the maximum sigmoidal fitted cleavage efficiency. **(B)** Representative doubly mismatched targets from EMX1 off-target data were subjected to increasing doses of Cas9 RNP.
